# Supplementary material
Source: PubMed Central journal article supplement (PMC8072331)
Supplement: pnas.2100136118.sapp.pdf [file pnas.2100136118.sapp.pdf]

1 **Supplementary Information for**

2

3 **An ABCC-type transporter endowing glyphosate resistance in plants**

4 Lang Pan, Qin Yu\*, Junzhi Wang, Heping Han, Lingfeng Mao, Alex Nyporko, Anna  
5 Maguza, LongJiang Fan, Lianyang Bai\*, Stephen Powles\*

6

7 \*co-correspondence authors:

8 Qin Yu, qin.yu@uwa.edu.au; Lianyang Bai, lybai@hunaas.cn; Stephen Powles,  
9 stephen.powles@uwa.edu.au.

10

11

12 **This PDF file includes:**

13 Supplementary Materials and Methods

14 Figures S1 to S13

15 Tables S1 to S3

16 SI References

17

18

## 1 **SI Materials and Methods**

### 2 **Plant material**

3 Glyphosate resistance in an *Echinochloa colona* population studied here has been  
4 characterized (1, 2). Glyphosate resistant (GR) and susceptible (S) *E. colona*  
5 lines/populations used in this current study were described in our previous work (3).

6

### 7 **RNA-seq data analysis and selection of candidate transporter contigs**

8 RNA-seq was conducted to select for relevant membrane transporter genes using R  
9 and S lines isolated from within a single GR population. The RNA-seq experiment,  
10 data analysis, qPCR validation of the candidate genes in RNA-seq samples, and  
11 samples from multiple GR and S populations/lines and under different temperatures,  
12 were the same as described (3). Candidate transporter gene contigs were selected  
13 on the basis of statistical significance ( $p < 0.05$ ), magnitude of expression difference  
14 (fold change  $> 1.5$ ), and annotations with putative assignment to membrane  
15 transporters. Shoot material of GR and S plants was used for RT-qPCR validation and  
16 primers (*SI Appendix*, Table S1) were assessed for specificity to amplify a single PCR  
17 product with efficiencies between 84–115%. Leaf, stem and root tissues of 10 R and  
18 S plants (at the three- to four-leaf stage) were also separately harvested for RT-qPCR  
19 investigation of *EcABCC8* expression patterns. Each experiment included three  
20 biological replicates and was repeated at least twice.

21

### 22 **Rice genetic transformation with the two ABC transporter genes *EcABCC8* and**

### 23 ***EcABCC10***

24 Based on *Echinochloa crus-galli* genome sequences (4), two primer pairs *EcABCC8*-F  
25 (5'-CATGTCCTGATACAATGGTAGG-3')/ *EcABCC8*-R (5'-GCGGCAATGGCAGATAAG-3')  
26 and *ECABCC10*-F (5'-CGTGCGTCGGAACAAGAA-3')/ *ECABCC10*-R  
27 (5'-CCCGACAAACGAGCCAAA-3') were designed from the UTR (Untranslated Region)  
28 to clone the full CDS of the two *E. colona* ABC transporter contig genes  
29 (*EC\_v4.g098055* and *EC\_v4.g102032*). The primer pair (F:  
30 5'-GGCGGGGATAAAGAACAC-3', R: 5'-GCCGATTAGGATGGAGTG-3') was designed to  
31 amplify the full region upstream of the *EcABCC8* ATG start codon (promoter

1 sequence) from genomic DNA of the GR and S *E. colona* plants. The resulting 1990 bp  
2 amplicon was validated by sequencing.

3 The two *E. colona* ABC transporter genes (named as *EcABCC8* and *EcABCC10*) were  
4 inserted into the transformation vector pOX under the 35S promoter to generate the  
5 *EcABCC8* expressing (*EcABCC8*-OE) and *EcABCC10* expressing (*EcABCC10*-OE) vectors  
6 (*SI Appendix*, Fig. S13). These recombinant vectors were used to transform the rice  
7 cultivar Nipponbare by *Agrobacterium tumefaciens*-mediated transformation.  
8 Generation of T1 *EcABCC8*-OE and *EcABCC10*-OE, and T2 *EcABCC8*-OE lines were  
9 described in our previous work (3). The T1 and T2 *GFP*-control (*GFP*) rice lines (3)  
10 were used as controls. Heterologous expression of *EcABCC8* and *EcABCC10* in  
11 transgenic rice was confirmed by successful PCR amplification of the vector HPT gene  
12 (3).

13 For evaluation of glyphosate sensitivity, the transgenic rice lines were grown in pots  
14 containing potting mix in a growth chamber with day/night temperature of 30/25°C  
15 and a 14-h photoperiod at a light intensity of 180  $\mu\text{mol m}^{-2} \text{s}^{-2}$  (3). At the three- to  
16 four-leaf stage, they were foliar treated with glyphosate at 540 g ha<sup>-1</sup> (the  
17 recommended field rate) using a 3WP-2000 hand-held system (Zhongnongjidian,  
18 China). Glasshouse glyphosate dose response experiments were conducted to  
19 quantify the resistance level using the four-leaf stage seedlings of one homozygous  
20 T<sub>2</sub> line of *EcABCC8*-OE. There were three replicate pots for each treatment and 8-10  
21 plants per pot. Above-ground plant material was harvested and fresh weight  
22 determined three weeks after treatment. The herbicide rate causing 50% growth  
23 reduction (GR<sub>50</sub>) was estimated by fitting data to the four-parameter log-logistic  
24 model using SigmaPlot 13.0 (Systat Software, Inc., San Jose, USA) as described (5).  
25 Significant difference in GR<sub>50</sub> values between treatments was tested by Prism.

26

### 27 **Homologous overexpression of *EcABCC8* orthologs in other crop plants**

28 The *Oryza sativa* gene (LOC\_Os06g36650) is orthologous to the *EcABCC8* gene. The  
29 3588-bp CDS was amplified (named as *OsABCC8*) and ligated into the pOX vector  
30 with *KpnI* and *MluI* restriction sites (*SI Appendix*, Fig. S13) for *A. tumefaciens*  
31 transformation using the procedures as described (3, 6). The *OsABCC8* transcript  
32 level was found to be 26-fold higher in *OsABCC8*-OE than in *GFP* rice by RT-qPCR

1 using gene specific primers. T<sub>1</sub> rice seedlings (*OsABCC8*-OE) were grown in pots in a  
2 greenhouse at 28°C with a 14-h photoperiod, and the pots were placed in large  
3 plastic trays with regular watering. Plants at the five- to six-leaf stage were  
4 glyphosate treated.

5 A 4482-bp CDS of the orthologous gene in *Zea mays* (Zm00001d046226) was  
6 amplified (named as *ZmABCC8*), and cloned into the binary vector NEWMOL to  
7 generate the NEWMOL-*ZmABCC8* construct with *SacI* and *BamHI* restriction sites (*SI*  
8 *Appendix*, Fig. S13) for *A. tumefaciens* transformation (7). The *ZmABCC8* gene was  
9 27-fold higher expressed in *ZmABCC8*-OE than in the wildtype (WT) maize seedlings.  
10 T<sub>1</sub> maize seedlings were grown under the same conditions as rice, and the four- to  
11 five- leaf stage plants were used for glyphosate treatment.

12 A 4394-bp CDS of the orthologous gene in *Glycine max* (Glyma.07G011600.1) was  
13 amplified (named as *GmABCC8*), and cloned into the pCAMBIA3301 vector  
14 containing a CaMV 35S promoter and a *bar* gene (*SI Appendix*, Fig. S13) for *A.*  
15 *tumefaciens*-mediated hairy root transformation (8). The *GmABCC8* transcript level  
16 was 22-fold higher in *GmABCC8*-OE than in WT soybean seedlings. T<sub>1</sub> soybean  
17 seedlings were grown at 25°C with a 16-h photoperiod for two weeks before being  
18 transferred to the glasshouse under the same conditions as rice, and the five- to  
19 six-leaf stage plants were glyphosate treated.

20 The field rate of glyphosate (540 g ha<sup>-1</sup>) was first used to test the sensitivity of these  
21 crop plants overexpressing *EcABCC8* orthologs, and then growth response to a range  
22 of glyphosate rates was measured to quantify the resistance levels as described  
23 above for *EcABCC8* transgenic rice.

24

#### 25 **Rice *OsABCC8* gene knockout by CRISPR/Cas9 gene editing**

26 The non-functional *OsABCC8* knock out (*OsABCC8*-KO) rice lines were generated  
27 using CRISPR/Cas9. A 19-bp targeting sequence was selected and the targeting  
28 specificity was confirmed using a Blast search against the rice genome  
29 (<http://blast.ncbi.nlm.nih.gov/Blast.cgi>) (9) , and then integrated into the pBGK032  
30 vector. The CRISPR/Cas9 plasmids were introduced into *A. tumefaciens* strain  
31 EHA105. Rice transformation was performed as described previously (10). Genomic  
32 DNA was extracted from these transformants and primer pairs flanking the designed

1 target site were used for PCR amplification. The PCR products were sequenced  
2 directly and identified using the Degenerate Sequence Decoding method (11). The  
3 *OsABCC8* gene was sequenced in all T<sub>1</sub> transgenic lines, and homozygous mutants  
4 identified to generate 12 T<sub>2</sub> homozygous *OsABCC8* KO lines (six for *osabcc8-1* and six  
5 for *osabcc8-2* variant lines) and sequenced again for confirmation.

6 For glyphosate response, T<sub>2</sub> seedlings of the two non-functional KO variant lines  
7 (*osabcc8-1* and *osabcc8-2*) at the three- to four-leaf stage, were foliar treated with  
8 glyphosate at 26, and 105 g ha<sup>-1</sup>, respectively. Then growth response (GR<sub>50</sub>) to  
9 glyphosate (0, 16, 31, 63, 135, 270, and 540 g ha<sup>-1</sup>), was measured to estimate the  
10 magnitude of changes in glyphosate sensitivity. There were five seedlings per pot  
11 and three replicate pots per treatment per KO line.

12

### 13 **Global DNA methylation analysis for *E. colona***

14 Genomic DNA was extracted from the GR and S shoot material using the Qiagen  
15 DNeasy Plant Minikit. MethylC-seq libraries were prepared as described (12, 13) and  
16 three biological replicates were used per sample. Clean BS-seq reads were mapped  
17 to the reference genome of *E. crus-galli* (4), with the Bisulfite Sequence Mapping  
18 Program (BSMAP) aligner (14). Calculation of methylation status of each cytosine in *E.*  
19 *crus-galli* genome and binomial test using the false discovery rate (FDR) for each  
20 cytosine base in the *E. crus-galli* genome was performed as described (15). Only  
21 cytosines covered with at least four reads in a library were considered to identify  
22 DMRs (differentially methylated regions). Cytosines (Cs) or thymines (Ts) were  
23 counted separately in each sliding window for three sequence contexts (CG, CHG, or  
24 CHH). The methylation level for a sliding window and DMRs was determined as  
25 described (16). DNA methylation levels of different libraries were compared pairwise  
26 using Fisher's exact test, and *p*-values were adjusted for multiple comparisons using  
27 the Benjamini–Hochberg method.

28

### 29 **Subcellular localization of ABCC8**

30 The full CDS of *EcABCC8* (except for the stop codon) was cloned into the pMD19-T  
31 simple vector for sequence confirmation and then cloned into the vector  
32 pBWA(V)HS580 to produce a fusion gene with GFP under control of the CaMV35S

1 promoter, using the Clontech in-fusion PCR cloning system (TaKaRa). The plasmid  
2 pBWA(V)HS580-35S:*EcABCC8-GFP* was used for rice protoplast transformation with  
3 pBWA(V)HS580-35S:*GFP* as a background control,  
4 pBWA(V)HS580-35S:*SCAMP1-mRFP* as a PM protein marker (17) and  
5 pBWA(V)HS580-35S:*AtTPK3-mRFP* as a tonoplast marker. Rice (Nipponbare) and  
6 Arabidopsis seeds were germinated and cultured for 8 d on 1/2 MS culture medium  
7 at 28 °C under continuous light. Shoot material (2 mm sections) for rice (18) and  
8 arabidopsis (19) were used for protoplast isolation. Ten microgram plasmids of  
9 *35S:EcABCC8-GFP* and *35S:SCAMP1-mRFP*, *35S:EcABCC8-GFP* and *35S:AtTPK3-mRFP*  
10 or *35S:GFP* alone were mixed with 220  $\mu\text{l}$  40% ( $0.4 \text{ g ml}^{-1}$ ) PEG-4000 and used for  
11 transformation of protoplasts (200  $\mu\text{l}$ ) with 16 h incubation in the dark. For each  
12 treatment, >20 individual cells were imaged by MCLSM. The PM location of the  
13 maize ortholog GmABCC8 was determined following the same protocol as for  
14 *EcABCC8*.

15

#### 16 **Glyphosate efflux and content in leaf discs of transgenic rice seedlings**

17 Glyphosate efflux and content at the cellular level was investigated using leaf discs.  
18 Two-leaf stage transgenic rice T<sub>2</sub> seedlings, *EcABCC8-OE* versus *GFP* and *OsABCC8 KO*  
19 (*osabcc8-1*) versus WT, were used. Two fully expanded young leaves were collected  
20 from each plant (n = 5 plants) and surface sterilized with 70% ethanol. Six leaf discs  
21 toward the base of each leaf (avoiding taking the midrib) were sampled from each  
22 leaf using a 1 mm cork borer. Each set of the 60 fresh leaf discs were weighed and  
23 vacuum infiltrated using a 20 mL syringe with 5 mM ammonium phosphate buffer  
24 (pH 5.5) containing 0.1% (v/v) Tween 80 and 10 mM sucrose. The infiltrated leaf  
25 discs were kept in the buffer medium at RT in low light conditions until used.

26 Glyphosate incubation and efflux were carried out using described procedures (20,  
27 21). Briefly, infiltrated leaf discs of each replicate (60 leaf discs per replicate and  
28 three replicates per time point) were transferred into plastic wells containing 5 mL  
29 60  $\mu\text{M}$  glyphosate and incubated for 24 h at 25°C with gentle stirring. The leaf discs  
30 were then rapidly rinsed with fresh buffer medium and an aliquot of the solution  
31 medium was removed from the wells at various time intervals (2.5, 5, 10, 15, 30, 60  
32 and 90 min), and the glyphosate concentration measured in the aliquots using

1 HPLC-Q-TOF-MS (3). After completion of the efflux experiment, glyphosate was  
2 extracted from leaf discs in 10% (v/v) cold methanol and measured by UPLC-MS/MS  
3 (3).

4 The glyphosate efflux to the external medium was estimated using a modified  
5 hyperbola model  $y=at/1+bt$  (SigmaPlot 13.0, Systat Software, San Jose, CA, USA).  
6 Where  $y$ = amount of glyphosate in the medium,  $a$ = asymptotic value,  $b$ = increase rate  
7 of the amount of glyphosate for a given increase in efflux time, and  $t$ = efflux time.  
8 Significant difference in efflux rates ( $b$ ) between treatments is tested by the Prism.  
9 The experiment was repeated with similar results.

10

### 11 **Glyphosate quantification in leaf protoplasts of transgenic rice plants**

12 Shoot material of three- to four-leaf stage seedlings (two  $T_2$  *EcABCC8*-OE rice lines  
13 versus the *GFP*, and two *OsABCC8* KO lines versus the WT) were used for  
14 experiments. For *in vivo* glyphosate treatment, seedlings were first foliar sprayed  
15 with glyphosate at  $68 \text{ g ha}^{-1}$  (one eighth of the recommended field rate) and then  
16 protoplasts isolated 2 and 6 h after treatment following a published protocol (18)  
17 and kept at  $-80 \text{ }^\circ\text{C}$ . Unabsorbed glyphosate on the shoot material was removed by  
18 washing in deionized water for 3 min. Protoplast number was estimated under the  
19 microscope with a hemocytometer and intactness (81-86%) evaluated by fluorescence  
20 staining using fluorescein diacetate (FDA) (22). Samples were refluxed in  $1\text{N H}_2\text{SO}_4$  at  
21  $90 \text{ }^\circ\text{C}$  for 2 h, followed by centrifugation at  $10,000g$  (23), and the supernatant was  
22 used for glyphosate quantification using HPLC-Q-TOF-MS (3).

23 *In vitro* glyphosate treatment followed an established protocol (24) with  
24 modifications. Glyphosate was added to 5 ml protoplast preparation (in MES buffer,  
25 pH 5.6) at a final concentration of  $60 \text{ }\mu\text{M}$ . The protoplast suspension was gently and  
26 constantly stirred on a reciprocal shaker during the treatment at  $28^\circ\text{C}$ . One and 2h  
27 after glyphosate treatment, 0.4 ml of the protoplast suspension was sampled from  
28 the incubation medium and overlaid on a 0.5 ml cushion of silicon oil. Treated  
29 protoplasts (83-86% intactness) were separated from the incubation medium and  
30 silicon oil by centrifugation for 2 min at  $6,500g$ , and the pellet was solubilized  
31 overnight at  $55^\circ\text{C}$  in a mixture of 0.1% Triton-X-100,  $\text{HClO}_4$  and 30%  $\text{H}_2\text{O}_2$ . After

1 centrifugation, the supernatant was used for quantification.  
2 For time-dependent glyphosate accumulation in protoplasts, one T<sub>2</sub> *EcABCC8*-OE rice  
3 line versus the *GFP* was used, and 0.4 ml of the protoplast suspension were sampled  
4 5, 10, 20, 40, 60, 80, 100 and 120 min after glyphosate treatment. The primary  
5 glyphosate metabolite AMPA (60 μM) was used as a control following the same  
6 treatment procedure as glyphosate. HPLC-Q-TOF-MS (3) was used for quantification  
7 of AMPA.  
8 About 2-4 g shoot material was used for each protoplast preparation with three  
9 biological replicate preparations and two technical replicates per treatment.  
10 Significant difference in glyphosate levels between treatments was tested by Prism.  
11 The time-dependency experiments were repeated with similar results.

12

### 13 **Structural reconstruction of *EcABCC8* variant**

14 Spatial structure of full-length *EcABCC8* in the inward-facing and outward-facing  
15 (open and close) conformations was reconstructed with combination of homology  
16 modelling approaches (using desktop Modeller software and SwissModel web service)  
17 (25, 26) and *ab initio* approaches (using Robetta web-service for reconstruction of  
18 TMD0 spatial structure and the loop between the TMD0 and TMD1 domains). The  
19 search and scoring of structural templates were performed via internal tools of  
20 (Modeller/SwissModel/Robetta) as well as web-service HHPred based on the  
21 pairwise comparison of hidden Markov models (HMMs) profiles (27, 28). The spatial  
22 structures of bovine MRP1 (29, 30) in an open (PDB access code 5uja) and closed  
23 (PDB access code 6bhu) status were used as base templates for reconstruction of the  
24 inward-facing and outward-facing conformation of *EcABCC8*, respectively. These  
25 entries revealed the highest scores among all possible structural templates. The  
26 extremely similar distribution of secondary structure elements between *EcABCC8*  
27 and MRP1 sequences (28) and similar domain architecture (31) are additional  
28 indicators of 3D structural similarity between these homological proteins.

29 Blind docking of the glyphosate molecule into the *EcABCC8* surface was performed  
30 with the S4MPLE software (32) that uses hybrid genetic algorithms combining  
31 molecular modelling-specific optimization with classical evolutionary sampling



1 strategies and especially specified for accurate prediction and evaluation of binding  
2 patterns. The docking procedure used the following parameters: size of population  
3  $n_{pop}=30$ , number of generation  $n_{gen}=300$ , minimal differences for interaction  
4 fingerprint of two non-redundant conformers (related to fingerprint size)  
5  $minfpdiff=0.01$ . All on-surface exposed residues except lipid-contact ones were used  
6 as hotspots for docking. To confirm the localization of glyphosate binding site(s) the  
7 alternative docking was also performed with the FlexX software (BioSolveIt,  
8 [www.biosolveit.de](http://www.biosolveit.de)) that uses knowledge-based scoring functions instead of force  
9 field-based scoring in S4MPLE. Two hundred iterations per search with 200  
10 maximum solutions per iteration were used, and the maximal 2.9 Å protein-ligand  
11 clash and 0.5 Å intra-ligand clashes are considered to be acceptable. Both software  
12 placed the best scoring solutions at the same sites on the protein surface, and the  
13 RMSD between them does not exceed 0.6 Å. The glyphosate topology for application  
14 in molecular dynamics (MD) simulations was performed via the web-based tool Swiss  
15 Param (33).

16 The integration of EcABCC8-glyphosate complexes into bilipid membrane, periodic  
17 box generation and solvation of the studied molecular systems were performed with  
18 CHARMM-GUI web service (34). The orientation of EcABCC8 in PM, borders and  
19 thickness of the membrane were calculated with PPM web server (35). A lipid  
20 composition of PM was reconstructed using Membrane Builder tool of CHARMM-GUI.  
21 The energy minimisation of the studied systems was carried out using LBFG  
22 algorithm (36), position restrained MDs for canonical NVT (N for particle number, V  
23 for volume, T for temperature) and isothermal-isobaric NPT (P for pressure).  
24 Ensembles were calculated within 100 ps intervals (to achieve the equilibrate state),  
25 and the unrestrained (productive) MD within 150 ns time intervals at 300K. All MD  
26 calculations were performed with the Gromacs software (37). Computational details  
27 correspond to a MD procedure described in our previous work (38). Moving of  
28 glyphosate molecule to and from the binding site(s) was calculated using a steered  
29 dynamics approach (39) with the rate of the reference position change of 0.01 Å per  
30 ps and force constant of  $1000 \text{ kJ mol}^{-1}\text{nm}^{-2}$ .

31

32

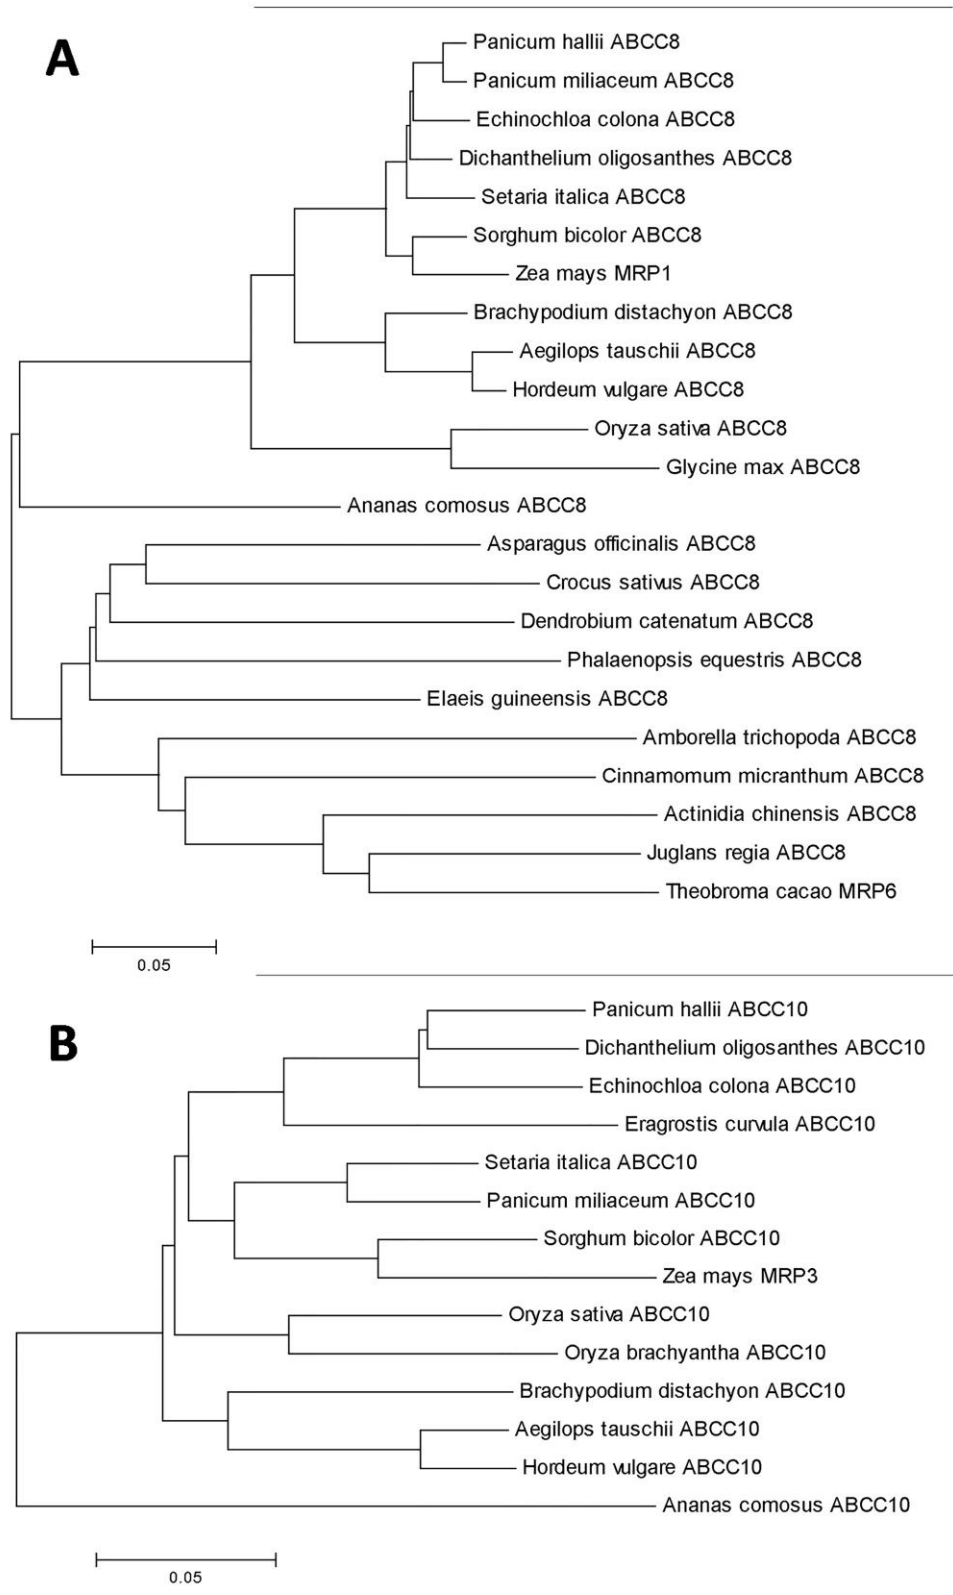

1

2 **Figure S1.** Phylogenetic analysis of *EcABCC8* (A) and *EcABCC10* (B). MEGA6 was used

3 for the tree construction using the neighbor joining method and clustal W program,

4 with boot strap method taking 500 replicates. The branch number (0.05) refers to the

5 bootstrap confidence.

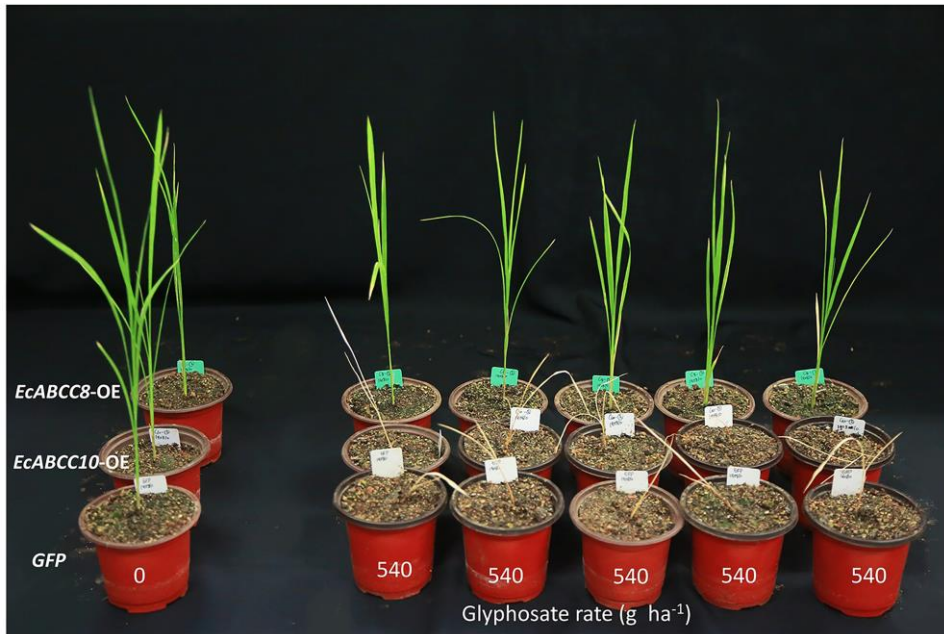

1

2 **Figure S2.** Resistance and susceptibility to glyphosate of transgenic rice. Growth  
3 response to glyphosate of T<sub>1</sub> rice seedlings expressing *EcABCC8* (*EcABCC8-OE*) or  
4 *EcABCC10* (*EcABCC10-OE*), relative to the *GFP* control, recorded three weeks after  
5 glyphosate treatment. Note expression of the *EcABCC10* gene does not confer  
6 glyphosate resistance in rice transgenic lines. Only glyphosate surviving T<sub>1</sub> seedlings  
7 from *EcABCC8-OE* lines were shown.

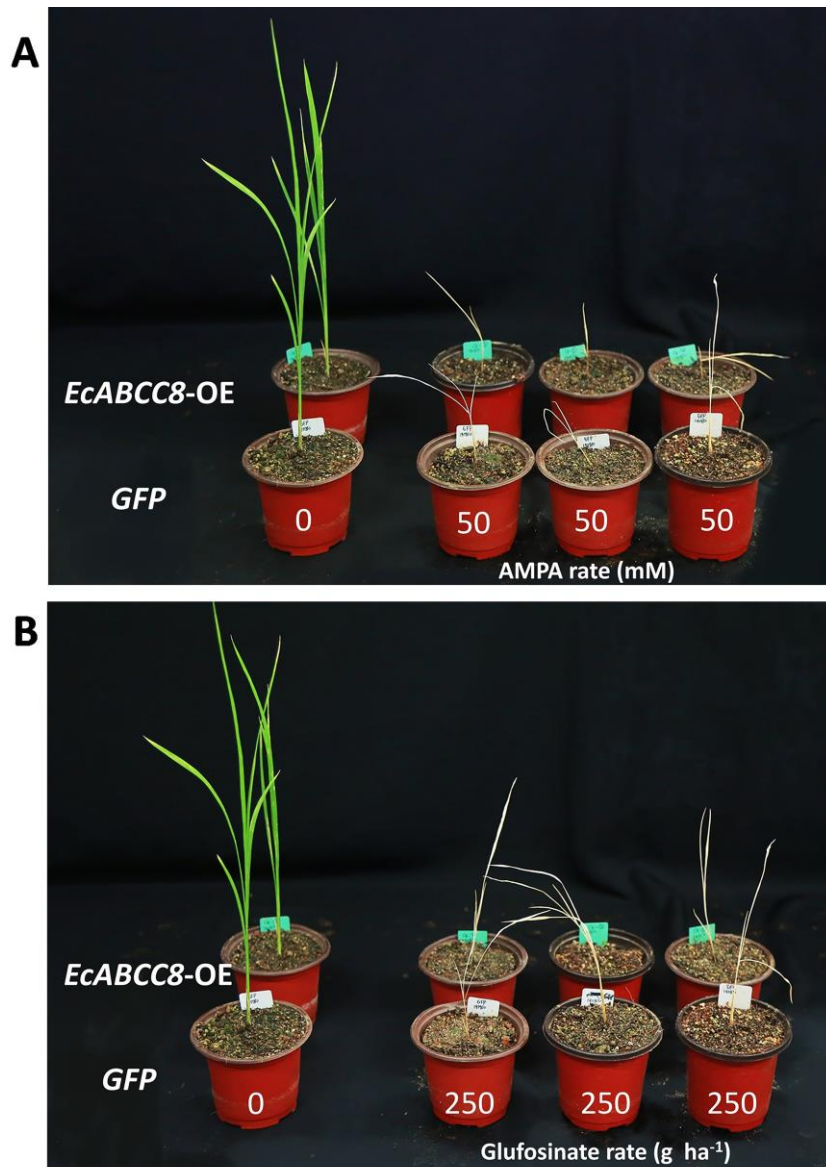

1  
 2 **Figure S3.** Response of transgenic rice to other compounds. Growth response to the  
 3 glyphosate metabolite AMPA (A), and glufosinate (B) of T<sub>1</sub> rice seedlings expressing  
 4 *EcABCC8* (*EcABCC8-OE*) versus *GFP* control, recorded three weeks after treatment.

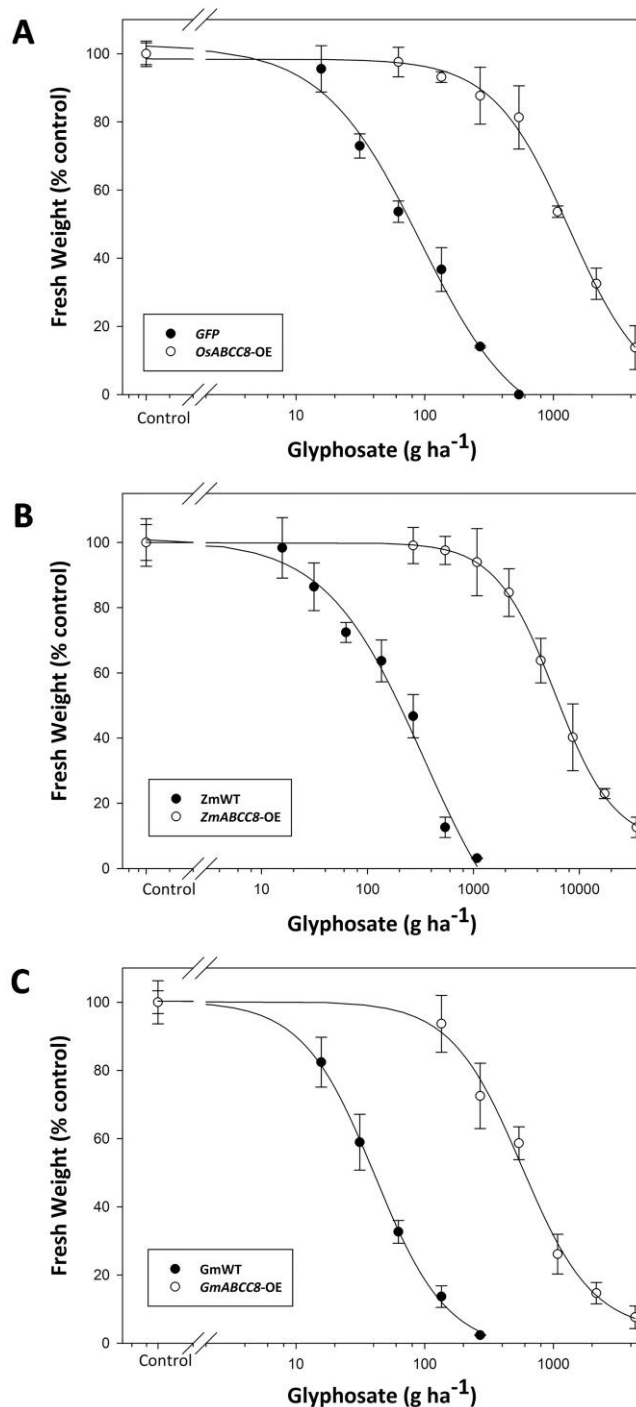

1

2 **Figure S4.** Glyphosate dose responses of transgenic crops overexpressing *EcABCC8*  
 3 ortholog genes. (A) *OsABCC8* (*OsABCC8-OE*) in rice, (B) *ZmABCC8* (*ZmABCC8-OE*) in  
 4 maize, and (C) *GmABCC8* (*GmABCC8-OE*) in soybean, relative to the *GFP* or  
 5 untransformed WT controls. Plants at the four- to six-leaf stage were foliar sprayed  
 6 with glyphosate, and results assessed three weeks after treatment. Data points are  
 7 means  $\pm$  SE ( $n=3$ ).

8

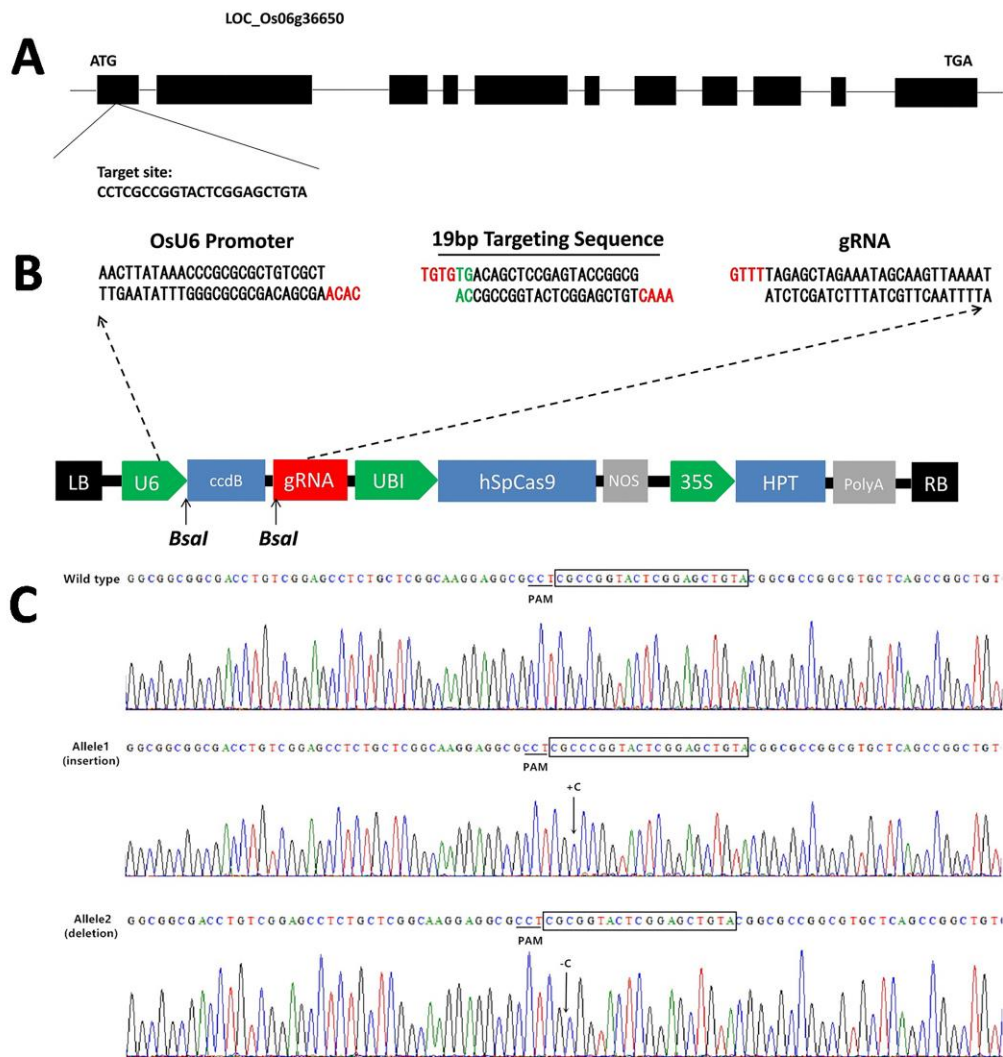

1  
2  
3  
4  
5  
6  
7  
8  
9  
10  
11  
12  
13  
14

**Figure S5.** CRISPR/Cas9-induced *OsABCC8* (LOC\_Os06g36650) gene editing in rice. (A) Schematic of the LOC\_Os06g36650 gene structure and target site. Exons and introns are indicated with black rectangles and black lines, respectively. (B) Structure of the CRISPR/Cas9 binary vector pBGK032. The key sequences and restriction sites for cloning are given. The expression of Cas9 is driven by the maize ubiquitin promoter (UBI); the expression of the sgRNA scaffold is driven by the rice U6 small nuclear RNA promoter (OsU6), and the expression of hygromycin (HPT) is driven by CaMV35S promoters (35S). Abbreviations: NOS, gene terminator; LB and RB, left border and right border, respectively. (C) Nucleotide sequences at the target site in the nine  $T_0$  rice mutants. The recovered mutant allele sequences are shown below the wild type sequence. Target site nucleotides are in black boxes and the protospacer adjacent motif (PAM) site is underlined. The inserted (Allele 1) or deleted (Allele 2) nucleotide is arrowed.

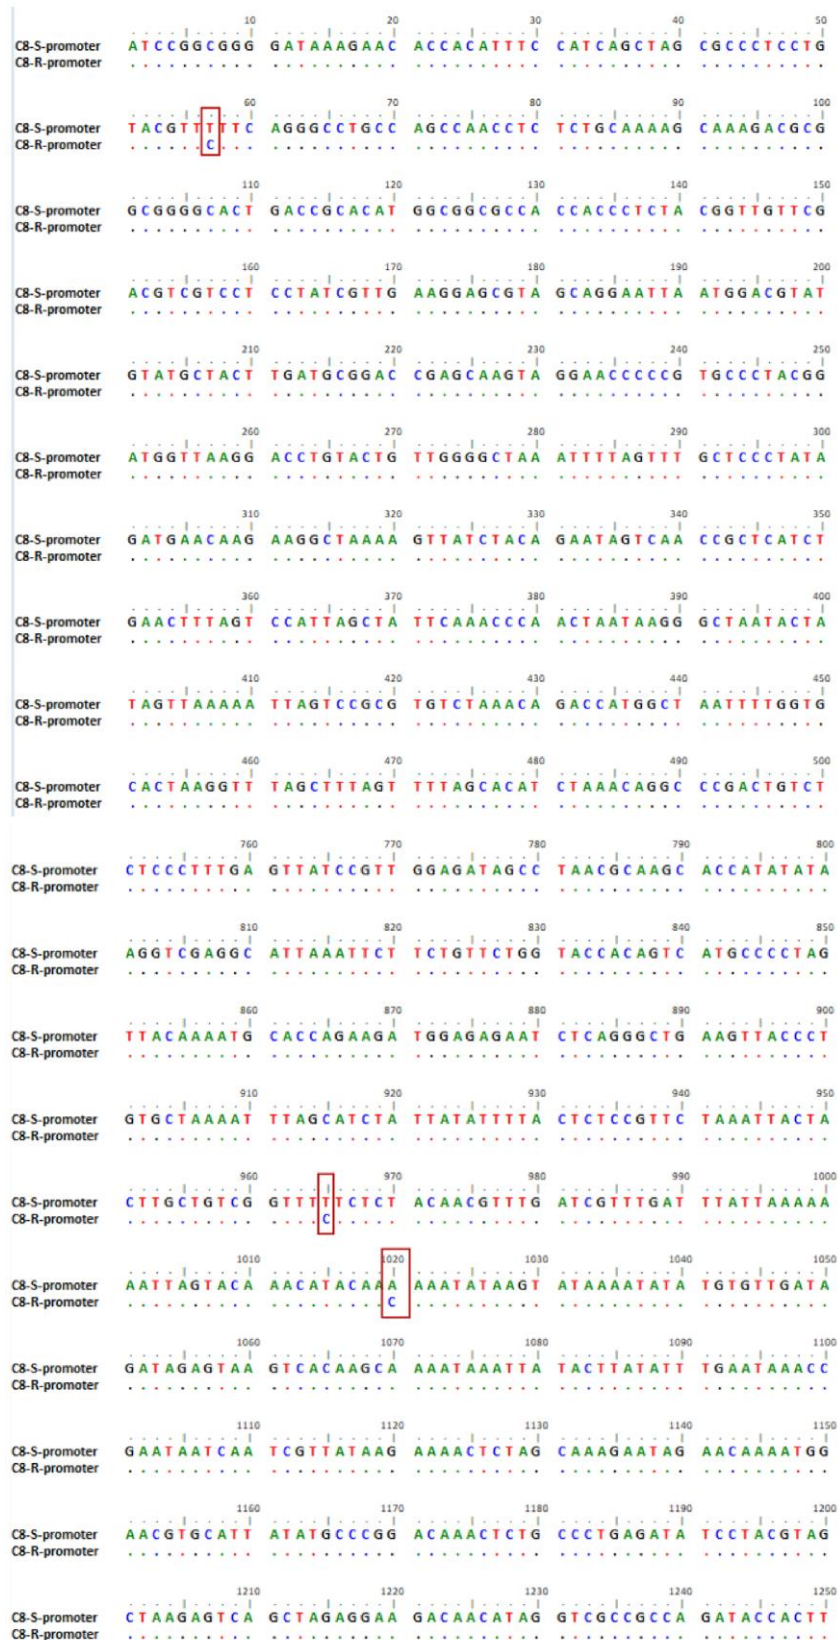

1

2 **Figure S6.** Comparison of the amplified *EcABCC8* promoter sequences from  
 3 glyphosate resistant (GR) and susceptible (S) *E. colona* plants. Single nucleotide  
 4 polymorphisms are boxed.

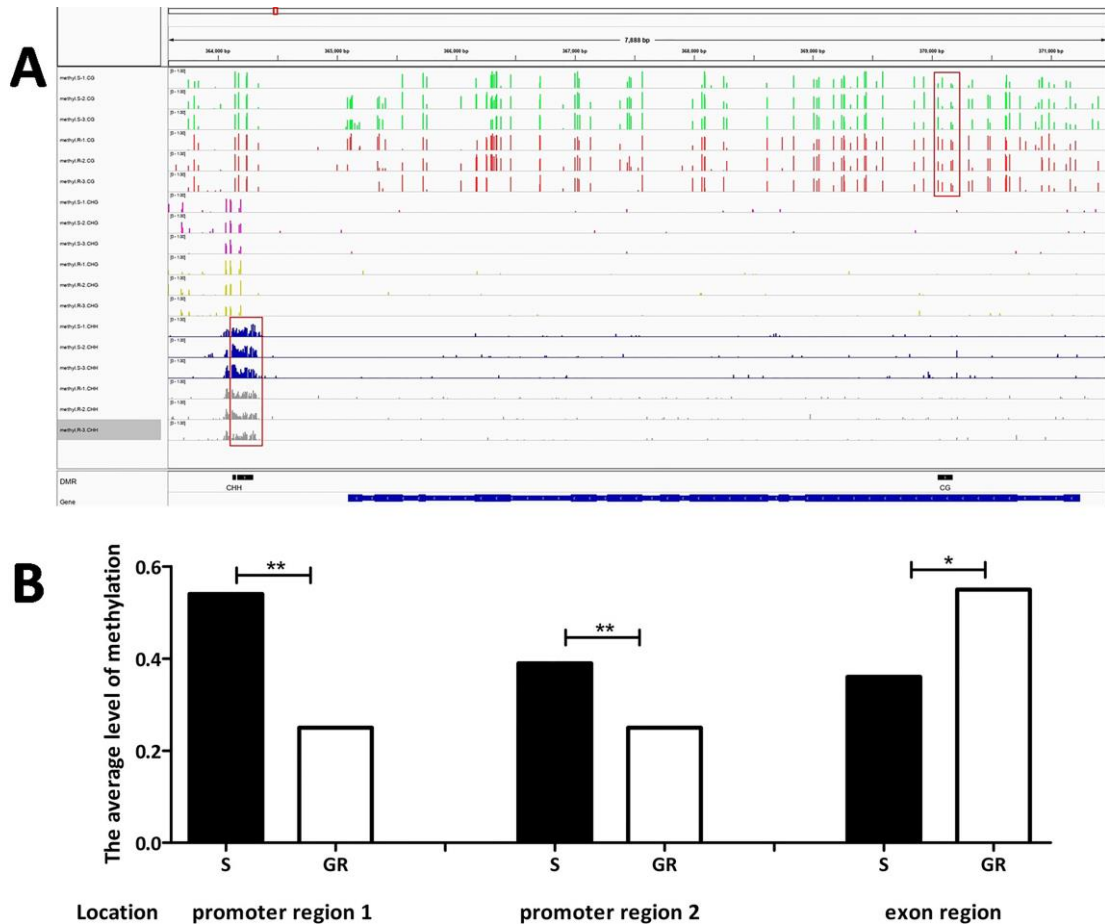

1

2 **Figure S7.** Global methylation analysis of the *EcABCC8* gene in S versus GR *E. colona*  
 3 samples. (A) Differentially methylated regions (DMRs) are proximal to the upstream  
 4 (promoter) and exon regions of the *EcABCC8* gene (EC\_v4.g098055) (S versus GR).  
 5 Significant difference in CHH and CG methylation ( $p < 0.05$ ; Student's *t*-test) is shown  
 6 in box. (B) Differentially DMRs of the *EcABCC8* gene between the S and GR plants in  
 7 two promoter (CHH methylation) and one exon (CG methylation) regions.  
 8 Significance of difference by the student *t*-test is indicated by \* ( $p < 0.05$ ) and  
 9 \*\* ( $p < 0.01$ ).

10



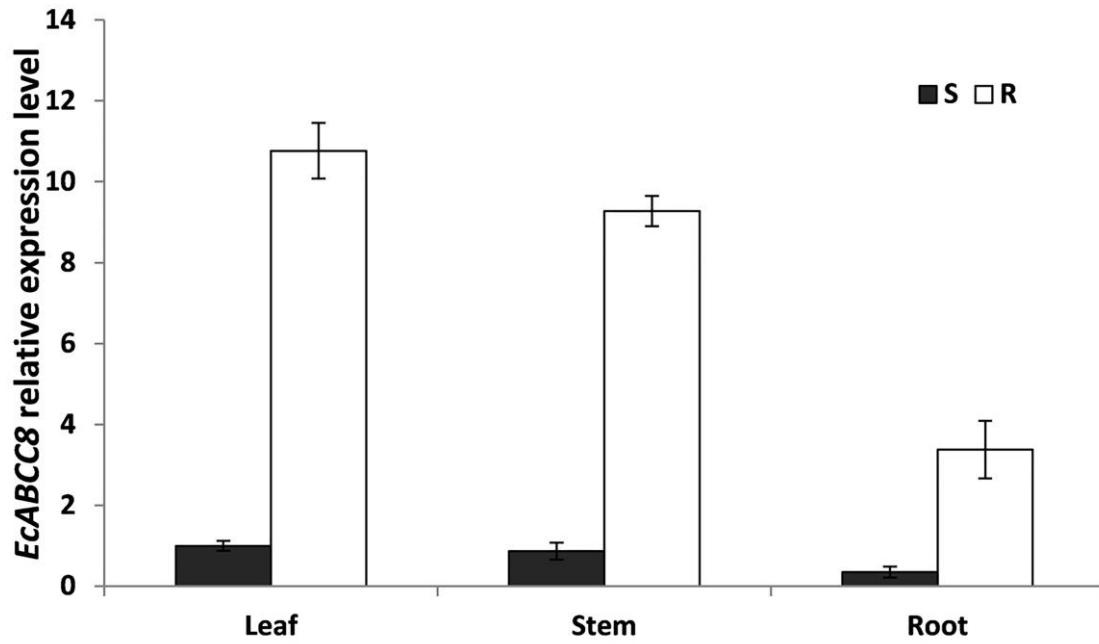

1  
2  
3  
4  
5

**Figure S8.** Tissue expression of EcABCC8. Relative expression levels of EcABCC8 in the leaf, stem and root tissue of GR and S *E. colona* plants. Data points are means  $\pm$  SE (n=3). Gene expression level in the leaf tissue of S plants was set as 1.

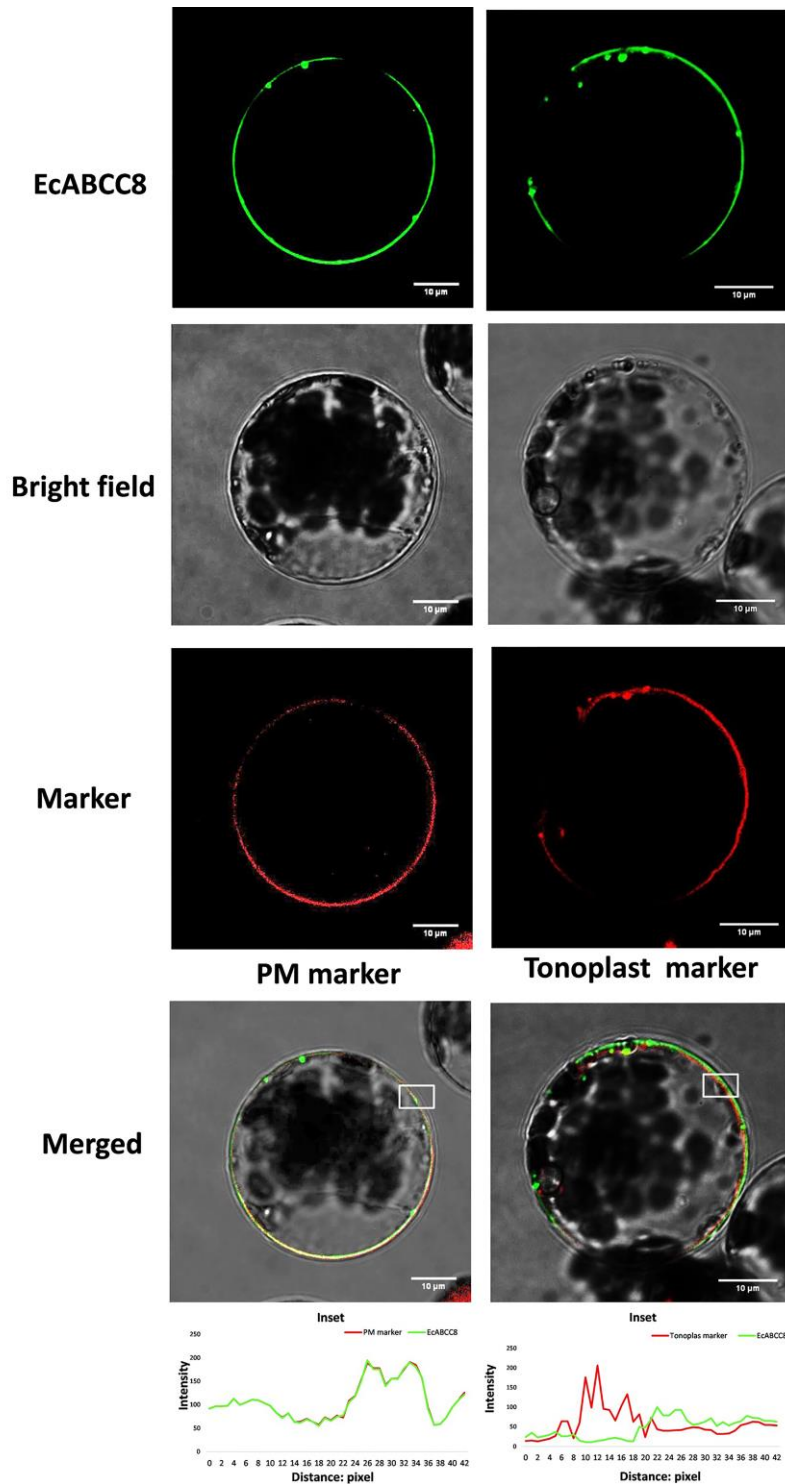

1  
2 **Figure S9.** Subcellular location of EcABCC8 in Arabidopsis protoplasts. Co-localization  
3 of the EcABCC8 and the plasma membrane (PM) marker, and lack of co-localization of  
4 the EcABCC8 and the tonoplast marker. Linescan analysis showing overlapping of  
5 fluorescence distribution of EcABCC8 (green) and the PM maker (red) (left panel),  
6 and separation of EcABCC8 (green) and the tonoplast marker (red) (right panel) in  
7 areas of interest (boxed). Scale bars: 10  $\mu$ m.

8

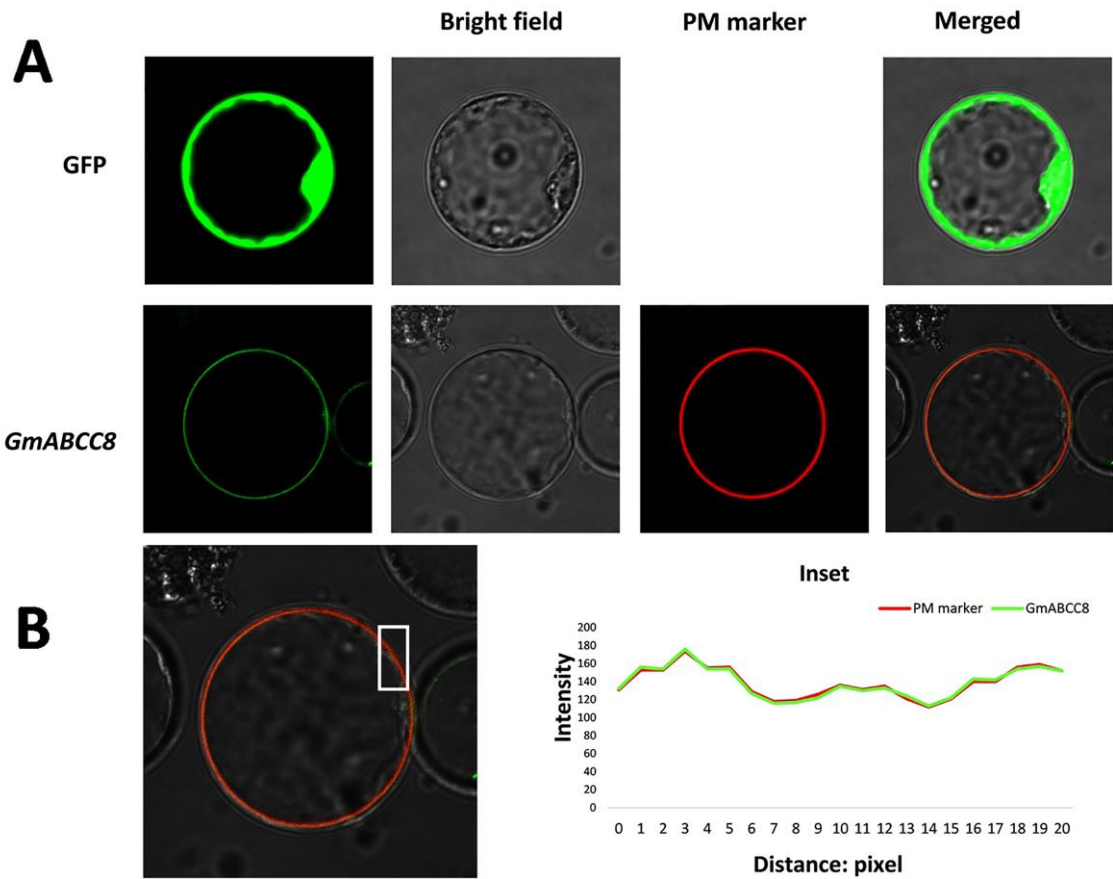

1

2 **Figure S10.** Subcellular location of GmABCC8. (A) Co-localization of the GmABCC8  
 3 and the plasma membrane (PM) marker, and (B) Linescan analysis showing  
 4 overlapping of fluorescence distribution of GmABCC8 (green) and the PM maker (red)  
 5 in areas of interest (boxed).

6

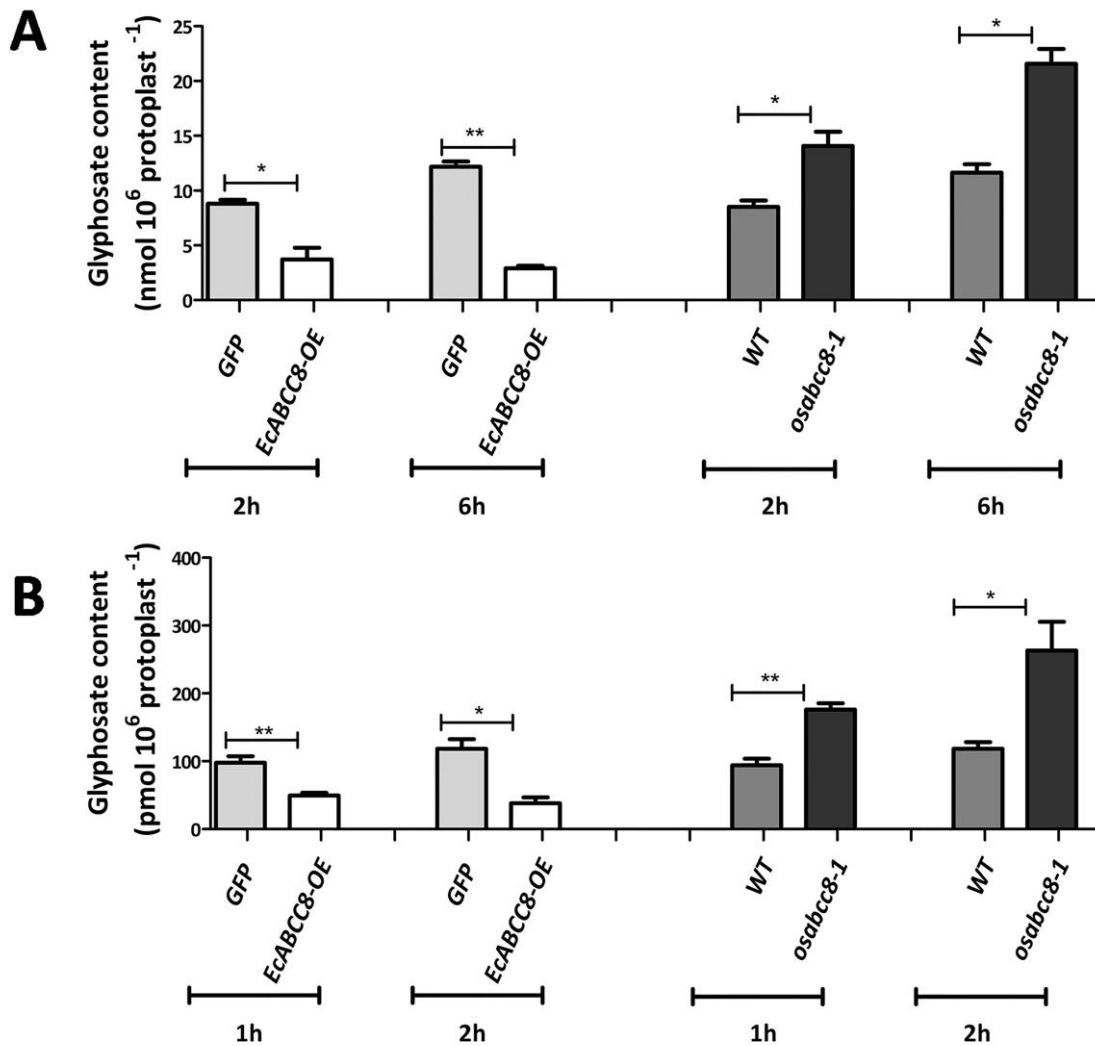

1  
2  
3  
4  
5  
6  
7  
8  
9  
10  
11  
12

**Figure S11.** Glyphosate content in rice leaf protoplasts of *EcABCC8-OE* vs *GFP*, and the ortholog knockout mutants of *osabcc8-1* vs wild type WT. (A) Intact plants were treated with glyphosate (68 g ha<sup>-1</sup>) and then protoplasts isolated for glyphosate quantification, 2 and 6 h after treatment. (B) Protoplasts were isolated, then treated with glyphosate (60 μM), and glyphosate quantified 1 and 2h after treatment. Data are means ± SE (n=3). Significance of difference by the student t-test is indicated by \*(p<0.05) and \*\*(p<0.01). Two *EcABCC8-OE* and two knockout mutant lines were used in the experiments with similar results and hence only one set of data is presented.

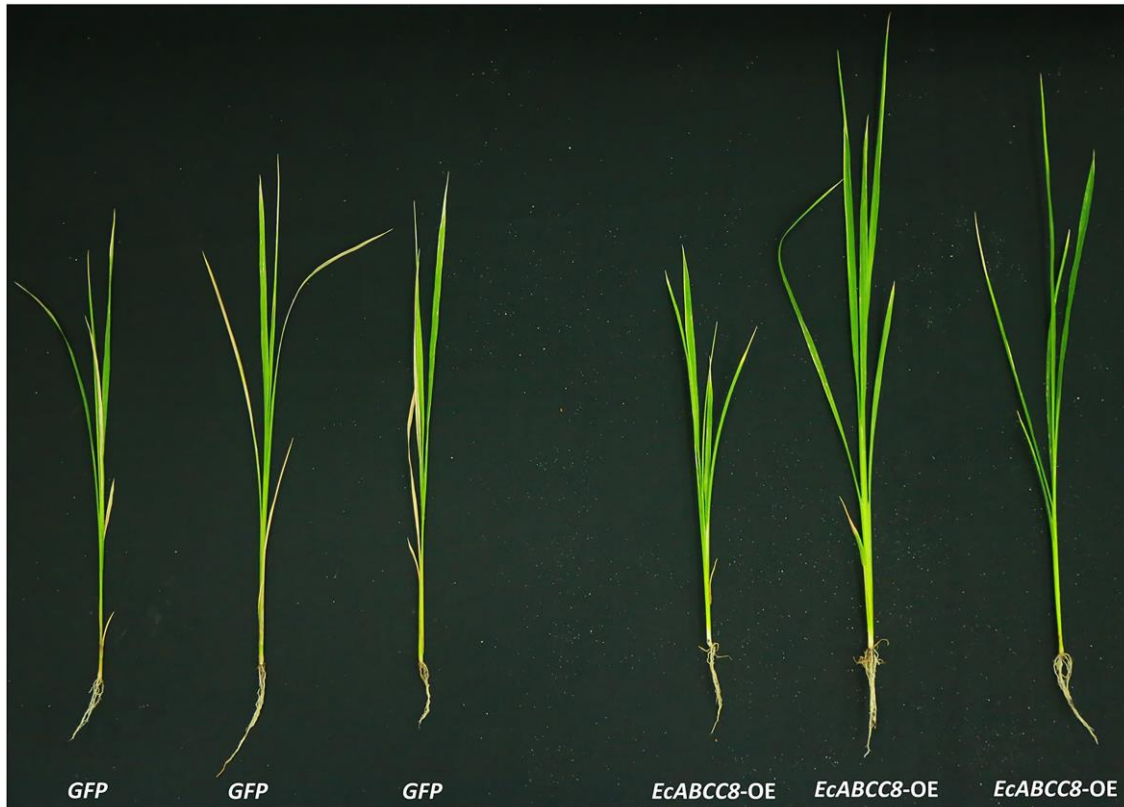

1  
2 **Figure S12.** Leaf symptoms of rice plants expressing *EcABCC8* (*EcABCC8*-OE) versus  
3 *GFP* control, three weeks following glyphosate treatment (540 g ha<sup>-1</sup>). Note the  
4 damage in leaf tips of *EcABCC8*-OE as compared to the damage across the whole  
5 leaves in *GFP* control.

6  
7

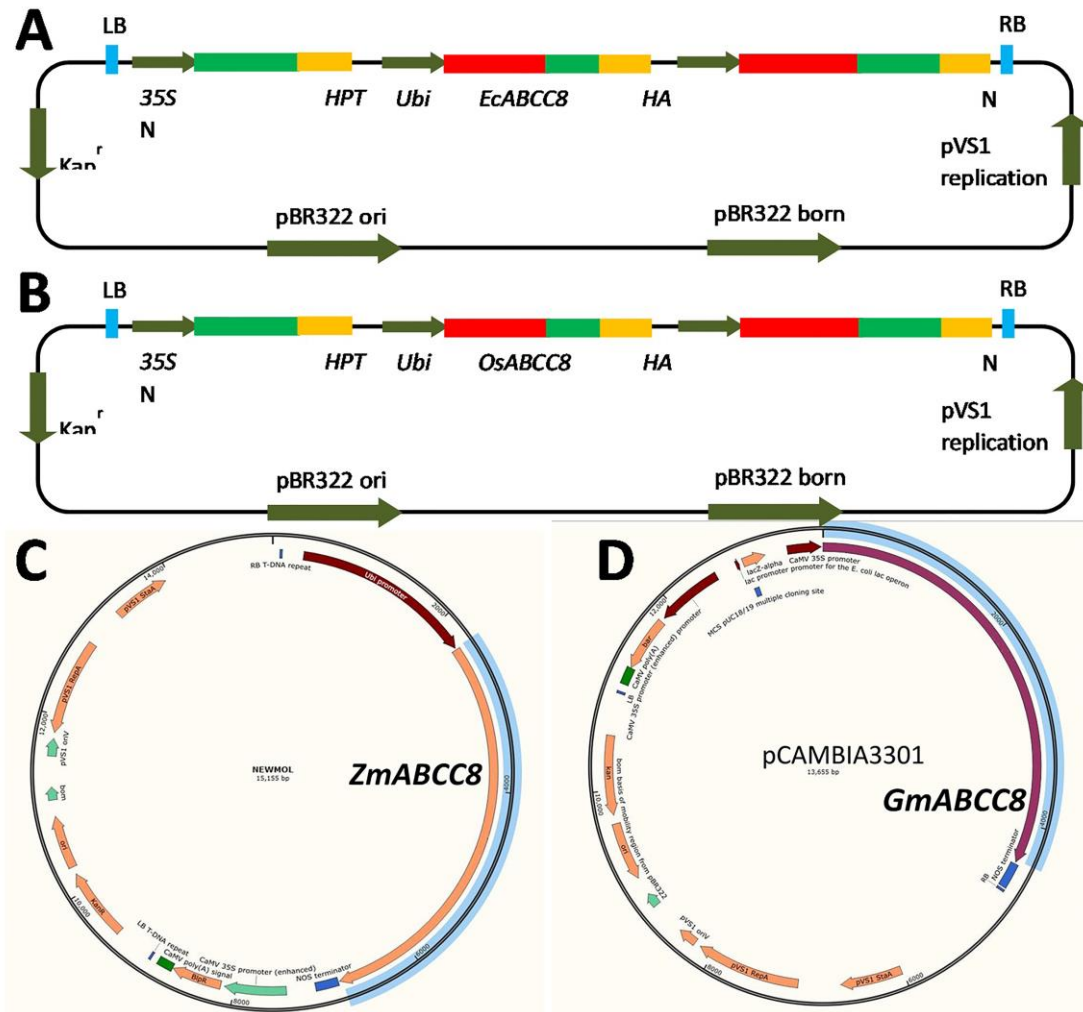

1

2 **Figure S13.** Vector construct for overexpression of the gene *EcABCC8* (A) and  
 3 *OsABCC8* (B) in rice, *ZmABCC8* in maize (C), and *GmABCC8* in soybean (D).

4

5

1 **Table S1.** Primers used for RT-qPCR analysis of the membrane transporter genes in  
 2 *Echinochloa colona*

| Gene_short_name             | Direction | Sequence (5'–3')         |
|-----------------------------|-----------|--------------------------|
| ABC transporter genes       |           |                          |
| EC_v4.g002994               | Forward   | TCACCGTCCAGCATTAGTTG     |
|                             | Reverse   | GGCTTCAACACATCAAACCTCTAC |
| EC_v4.g006991               | Forward   | GCACCGCTTGTCTTAAAGG      |
|                             | Reverse   | GATTTCCCACTTCCTGTCCTC    |
| EC_v4.g007634               | Forward   | TGACATGCTTACTGAACTCTCG   |
|                             | Reverse   | TCCAGACCCAGAATTTTGAGG    |
| EC_v4.g009219               | Forward   | CTTGTCCTGGTCCTTAGTGATG   |
|                             | Reverse   | CATCCCACTCATATACACCTCG   |
| EC_v4.g028874               | Forward   | AGCGATTCTCTCCAAGTTC      |
|                             | Reverse   | ATAGGTGTTGAAGATGGTCGG    |
| EC_v4.g029674               | Forward   | TGAAGTATCTTGGTGCCACTG    |
|                             | Reverse   | CTGGTGTGGTATCGGAGATTG    |
| EC_v4.g039770               | Forward   | GATATGGCTGATTCCGAGAGTC   |
|                             | Reverse   | CGAGTGTCTTCTGGTATCTTTGC  |
| EC_v4.g048404               | Forward   | ATTCTGGTAATGGAAGGCGG     |
|                             | Reverse   | ACTTGGTTCTGTTGACTGGC     |
| EC_v4.g058209               | Forward   | TGATGCCGTCAGTTATCGTC     |
|                             | Reverse   | CTCCTTCTCAATCTCACCATACG  |
| EC_v4.g069693               | Forward   | CCAACGAAGATGAAGGCAATG    |
|                             | Reverse   | GCTAGGGTGAGGTAATCCAG     |
| EC_v4.g071155               | Forward   | AGAGGCTCACTATTGCTGTTG    |
|                             | Reverse   | CCTTCCTGTGTCAACCATACTC   |
| EC_v4.g084948               | Forward   | AGCGATTCTCTCCAAGTTC      |
|                             | Reverse   | ATAGGTGTTGAAGATGGTCGG    |
| EC_v4.g095434               | Forward   | GAGAGGTCATTGTTCCAAGG     |
|                             | Reverse   | GCAATAAGTTGGCGTTGTCC     |
| EC_v4.g098055               | Forward   | CGGCTGATTCTGAGGGTAATG    |
|                             | Reverse   | GGTAGGTCTTTCTTCAAGGG     |
| EC_v4.g099458               | Forward   | ATGTTACGCTGGAAGATGGG     |
|                             | Reverse   | TGATGGAGAAGGCAAAGACG     |
| EC_v4.g102032               | Forward   | AACGAGAGGAAAGAGAAATGGG   |
|                             | Reverse   | CGCAGCTAAGAAAATCATGTGG   |
| Phosphate transporter genes |           |                          |
| EC_v4.g025847               | Forward   | GACGCCTACGACCTCTTCTG     |
|                             | Reverse   | CGAGGAAGGTGAGTATGAAGC    |
| EC_v4.g065319               | Forward   | CAAAGCCGAAGGATCAATGC     |
|                             | Reverse   | GAAGACTCCAGCAATATACCCC   |

3

1 **Table S2.** Identification of differentially expressed membrane transporter genes in  
 2 glyphosate resistant (GR) and susceptible (S) *E. colona* using RNA sequencing  
 3 (RNA-seq)

| Gene_short_name             | RNA-seq     |              | RT-qPCR validation |              |
|-----------------------------|-------------|--------------|--------------------|--------------|
|                             | Fold change | Significance | Ratio (R/S)        | Significance |
| ABC transporter genes       |             |              |                    |              |
| EC_v4.g002994               | 1.8         | *            | 1.7                | *            |
| <b>EC_v4.g006991</b>        | <b>5.2</b>  | <b>**</b>    | <b>5.5</b>         | <b>**</b>    |
| EC_v4.g007634               | 1.7         | *            | 1.8                | *            |
| EC_v4.g009219               | 1.6         |              | 1.5                | *            |
| EC_v4.g028874               | 1.6         |              | 1.7                | *            |
| EC_v4.g029674               | 1.6         |              | 1.5                | *            |
| <b>EC_v4.g039770</b>        | <b>1.7</b>  | *            | <b>6.0</b>         | *            |
| <b>EC_v4.g048404</b>        | <b>6.3</b>  | <b>**</b>    | <b>7.5</b>         | <b>**</b>    |
| EC_v4.g058209               | 2.4         | *            | 3.1                | *            |
| EC_v4.g069693               | 2.4         | *            | 2.5                | *            |
| EC_v4.g071155               | 1.8         | *            | 2.1                |              |
| EC_v4.g084948               | 1.6         |              | 1.9                | *            |
| EC_v4.g095434               | 1.7         | *            | 1.7                | *            |
| <b>EC_v4.g098055</b>        | <b>9.0</b>  | <b>**</b>    | <b>10.3</b>        | <b>**</b>    |
| EC_v4.g099458               | 2.1         | *            | 2.4                | *            |
| <b>EC_v4.g102032</b>        | <b>7.4</b>  | <b>**</b>    | <b>11.5</b>        | *            |
| Phosphate transporter genes |             |              |                    |              |
| EC_v4.g025847               | 2.9         | *            | 2.5                |              |
| EC_v4.g065319               | 2.2         | *            | 1.7                |              |

4 *p*-value <0.05, 0.01 indicated by \*, \*\*.

5

6



1 **Table S3.** Quantitative RT-PCR validation of the candidate ABC transporter contigs  
 2 from *Echinochloa colona* using a series of pre-phenotyped samples. R: glyphosate  
 3 resistant, S: glyphosate susceptible

| Sample sources                                           | Relative expression Ratio (R/S) |                   |                   |                   |                   |
|----------------------------------------------------------|---------------------------------|-------------------|-------------------|-------------------|-------------------|
|                                                          | EC_v4.g<br>098055               | EC_v4.g<br>102032 | EC_v4.g<br>006991 | EC_v4.g<br>039770 | EC_v4.g<br>048404 |
| RNA-seq results (based on FPKM values)                   | 9.0**                           | 7.4**             | 5.2**             | 1.7*              | 6.3**             |
| Validation of RNA-seq samples                            | 10.3**                          | 11.5*             | 5.5**             | 6.0*              | 7.5**             |
| Validation of spare RNA-seq samples                      | 12.5*                           | 9.8*              | 4.8*              | 3.9*              | 8.1*              |
| Population/line validation                               |                                 |                   |                   |                   |                   |
| $R_{\text{bulk}}/S_{\text{bulk}}$                        | 5.5**                           | 4.0**             | 1.7*              | 1.6               | 1.7*              |
| $R_{\text{single}}/S_{\text{single}}$                    | 6.4*                            | 7.1**             | 1.3               | 2.1               | 2.0*              |
| $R_{\text{bulk-R}}/R_{\text{bulk-S}}$                    | 2.5*                            | 2.4*              | 1.0               | 0.7               | 1.0               |
| $R_{\text{single-R}}/R_{\text{single-S}}$                | 2.7*                            | 2.6*              | 1.4               | 2.4*              | 2.7               |
| QBG1 (S) / $S_{\text{single}}$                           | 0.2**                           | 1.0               | 1.1               | 0.9               | 0.7               |
| Crossy (S)/ $S_{\text{single}}$                          | 0.4                             | 0.9               | 1.3               | 0.8               | 1.7               |
| $R_{\text{single}} (35/30C)/ R_{\text{single}} (25/20C)$ | 2.8**                           | 2.3*              | 1.2               | 0.7               | 1.3               |

4  $p$ -value <0.05, 0.01 indicated by \*, \*\*.

5 FPKM: fragments per kilobase of exon per million fragments

6

7

8

9

10

11

## 1 Supplemental References

- 2 1. T.A. Gaines, A. Cripps, S.B. Powles, Evolved resistance to glyphosate in Junglerice (*Echinochloa*
- 3 *colona*) from the tropical Ord Riverr-Region in Australia. *Weed Technol.* **26**, 480-484 (2012)..
- 4 2. S.S. Goh, *et al.*, Non-target-site glyphosate resistance in *Echinochloa colona* from Western
- 5 Australia. *Crop Prot.* **112**, 257-263 (2018).
- 6 3. L. Pan, *et al.*, (2019) Aldo-keto reductase metabolizes glyphosate and confers glyphosate
- 7 resistance in *Echinochloa colona*. *Plant Physiol.* **181**,1519-1534 (2019).
- 8 4. L. Guo, *et al.*, Echinochloa crus-galli genome analysis provides insight into its adaptation and
- 9 invasiveness as a weed. *Nat. Commun.* **8**, 1031 (2017).
- 10 5. H. Han, Q. Yu, M.J. Owen, G.R. Cawthray, S.B. Powles, Widespread occurrence of both
- 11 metabolic and target-site herbicide resistance mechanisms in *Lolium rigidum* populations. *Pest*
- 12 *Manag. Sci.* **72**, 255-263 (2016).
- 13 6. T. Seiichi, *et al.*, (2010) Early infection of scutellum tissue with Agrobacterium allows
- 14 high-speed transformation of rice. *Plant J.* **47**, 969-976 (2010).
- 15 7. Y.W. Zhang, *et al.*, Overexpression of a novel Cry1Ie gene confers resistance to Cry1Ac-resistant
- 16 cotton bollworm in transgenic lines of maize. *Plant Cell Tiss. Org.* **115**, 151-158 (2013).
- 17 8. A. Kereszt, *et al.*, Agrobacterium rhizogenes-mediated transformation of soybean to study root
- 18 biology. *Nature Protoc.* **2**, 948-952 (2007).
- 19 9. P.D. Hsu, *et al.*, DNA targeting specificity of RNA-guided Cas9 nucleases. *Nat. Biotechnol.* **31**,
- 20 827-832 (2013).
- 21 10. A. Nishimura, I. Aichi, M. Matsuoka, A protocol for Agrobacterium-mediated transformation in
- 22 rice. *Nature Protoc.* **1**, 2796-2802 (2006).
- 23 11. X. Ma, L. Chen, Q. Zhu, Y. Chen, Y.G. Liu, Rapid Decoding of sequence-specific
- 24 nuclease-induced heterozygous and biallelic mutations by direct sequencing of PCR Products. *Mol.*
- 25 *Plant* **8**, 1285-1287 (2015).
- 26 12. R. Lister, *et al.*, Global epigenomic reconfiguration during mammalian brain development.
- 27 *Science* **341**, 629+ (2013).
- 28 13. D. Secco, *et al.*, Stress induced gene expression drives transient DNA methylation changes at
- 29 adjacent repetitive elements. *eLife* **4**, 26 (2015).
- 30 14. Y. Xi, W. Li, BSMAP: whole genome bisulfite sequence MAPping program. *BMC bioinformatics*
- 31 **10**, 232 (2009).
- 32 15. S.L. Zhong, *et al.*, Single-base resolution methylomes of tomato fruit development reveal
- 33 epigenome modifications associated with ripening. *Nat. Biotechnol.* **31**, 154-159 (2013).
- 34 16. S.F. Geng, *et al.*, DNA methylation dynamics during the interaction of wheat progenitor
- 35 *Aegilops tauschii* with the obligate biotrophic fungus *Blumeria graminis* f. sp. *tritici*. *New Phytol.*
- 36 **221**, 1023-1035 (2019).
- 37 17. J. Ma, *et al.*, Disruption of OsSEC3A increases the content of salicylic acid and induces plant
- 38 defense responses in rice. *J. Exp. Bot.* **69**, 1051-1064 (2018).
- 39 18. Y. Zhang, *et al.*, A highly efficient rice green tissue protoplast system for transient gene
- 40 expression and studying light/chloroplast-related processes. *Plant Methods* **7**, 14 (2011).
- 41 19. C. Voelker, D. Schmidt, B. Mueller-Roeber, K. Czempinski, Members of the Arabidopsis
- 42 AtTPK/KCO family form homomeric vacuolar channels in planta. *Plant J.* **48**, 296-306 (2006).
- 43 20. J.A. Gougler, D.R. Geiger, Uptake and distribution of N-phosphonomethylglycine in sugar beet
- 44 plants. *Plant Physiol.* **68**, 668-672 (1981).
- 45 21. S.S. Goh, (2016) Quantitative estimation of fitness cost associated with glyphosate resistance
- 46 in *Echinochloa colona*. PhD thesis, The University of Western Australia, (2016).
- 47 22. P.J. Larkin, Purification and viability determinations of plant protoplasts. *Planta* **128**, 213-216
- 48 (1976).
- 49 23. Q. Yu, S. Huang, S.B. Powles, Direct measurement of paraquat in leaf protoplasts indicates
- 50 vacuolar paraquat sequestration as a resistance mechanism in *Lolium rigidum*. *Pestic. Biochem.*
- 51 *Phys.* **98**, 104-109 (2010).
- 52 24. M.H. Denis, S. Delrot, Carrier-mediated uptake of glyphosate in broad bean (*Vicia faba*) via a
- 53 phosphate transporter. *Physiol. Plantarum* **87**, 569-575 (1993).
- 54 25. N. Eswar, *et al.*, Comparative protein structure modeling using Modeller. *Curr. Protoc.*

1 *Bioinformatics* **5**, Unit-5.6 (2006).

2 26. A. Waterhouse, *et al.*, SWISS-MODEL: homology modelling of protein structures and  
3 complexes. *Nucleic Acids Res.* **46**, W296-W303 (2018).

4 27. A. Hildebrand, M. Remmert, A. Biegert, J. Söding, Fast and accurate automatic structure  
5 prediction with HHpred. *Proteins* **77**, 128-132 (2010).

6 28. L. Zimmermann, *et al.*, A completely reimplemented MPI bioinformatics toolkit with a new  
7 HHpred server at its core. *J. Mol. Biol.* **430**, 2237-2243 (2017).

8 29. Z.L. Johnson, J. Chen, Structural basis of substrate recognition by the multidrug resistance  
9 protein MRP1. *Cell* **168**, 1075-1085.e1079 (2017).

10 30. Z.L. Johnson, J. Chen, ATP binding enables substrate release from multidrug resistance protein  
11 1. *Cell* **172**, 81-89.e10 (2018).

12 31. S. Potter, *et al.*, HMMER web server: 2018 update. *Nucleic Acids Res.* **46**, W200-W204 (2018).

13 32. L. Hoffer, D. Horvath, S4MPLE-sampler for multiple protein–ligand entities: simultaneous  
14 docking of several entities. *J. Chem. Inf. Model.* **53**, 88-102 (2013).

15 33. V. Zoete, M.A. Cuendet, A. Grosdidier, O. Michielin, SwissParam: A fast force field generation  
16 tool for small organic molecules. *J. Comput. Chem.* **32**, 2359-2368 (2011).

17 34. S. Jo, T. Kim, V.G. Iyer, W. Im, CHARMM-GUI: A web-based graphical user interface for  
18 CHARMM. *J. Comput. Chem.* **29**, 1859-1865 (2008).

19 35. M. Lomize, I. Pogozheva, H. Joo, H. Mosberg, A. Lomize, OPM database and PPM web server:  
20 Resources for positioning of proteins in membranes. *Nucleic Acids Res.* **40**, D370-376 (2011).

21 36. B. Das, H. Meirovitch, I.M. Navon, Performance of hybrid methods for large-scale  
22 unconstrained optimization as applied to models of proteins. *J. Comput. Chem.* **24**, 1222-1231  
23 (2003).

24 37. M.J. Abraham, *et al.*, GROMACS: High performance molecular simulations through multi-level  
25 parallelism from laptops to supercomputers. *Software* **1-2**, 19-25 (2015).

26 38. Z. Chu, *et al.*, Novel  $\alpha$ -Tubulin mutations conferring resistance to dinitroaniline herbicides in  
27 *Lolium rigidum*. *Front. Plant Sci.* **9** (2018).

28 39. P.C. Do, E.H. Lee, L. Le, Steered molecular dynamics simulation in rational drug design. *J. Chem.*  
29 *Inf. Model.* **58**, 1473-1482 (2018).

30

31
